# Supplementary material
Source: publisher figshare collection journal article supplement (https://gsajournals.figshare.com/articles/dataset/_/7568822)
Supplement: Supplementary file 1 [file 2]

**Supplementary Table S1. Oligonucleotides used in this study.**

| Oligo name         | Primer sequence (5' → 3')                        | Construct                           |
|--------------------|--------------------------------------------------|-------------------------------------|
| str1 -966 KpnI     | 5' -AAAAGGTACCGGACAGACCCACTGTATGATCGTGTGTC       | Str1-GFP                            |
| str1 no stop BamHI | 5' -AAAAGGATCCAACCTTTGCTTTTCCTTCGAATCAAAAATGTGGG |                                     |
| GFP BamHI          | 5' -AAAGGATCCGGCCGCAGTAAAGGAGAAGAACCTTTTC        |                                     |
| GFP NotI           | 5' -TTTGCGGCCGCTTATTTGTATAGTTCATCCATGC           |                                     |
| frp1 RP BamHI      | 5' -CACCGGATCCGGGATATTACTTGCATTTATATTG           | frp1 riboprobe                      |
| frp1 RP EcoRI      | 5' -AAAAGAATTTCGACAGGAACAGCAATTAAAGTC            |                                     |
| sib2 RP2 BamHI     | 5' -CCAAAGGATCCGGTCCCGCTAGTCTTTCTTTCCCTTATTGC    | sib2 riboprobe                      |
| sib2 RP2 EcoRI     | 5' -CCAAAGAATTTCGGTGAAGTAAGAAGTAGGATCCCTGG       |                                     |
| shk1 -950 SacI     | 5' -AAAAGAGCTCGCGATACGATGTATTGTGACCAAATGAGAACC   | CRIB-GFP                            |
| jct prom EcoRI     | 5' -CCCCGAATTCAGTAAATAAAATTTATTAACGAAAAGGGTAAAG  |                                     |
| GIC2 atg EcoRI     | 5' -CCCGAATTCATGACTAGTGCAAGTATTACCAATACTGG       |                                     |
| GIC2 208 Sall      | 5' -AAAGTCGACCTTATTTTCGTGCGATCTTGAAATGAG         |                                     |
| GFP Sall           | 5' -AAAAGTCGACGGCCGCAGTAAAGGAGAAGAACCTTTTC       |                                     |
| GFP ApaI           | 5' -AAAAGGGCCCTTATTTGTATAGTTCATCCATGCCATG        |                                     |
| str1 y553a UP      | 5' -GAAAGACCAAGCAGCTACCATTTTTGAGAG               | Str1Y553A/Y567A-GFP mutant          |
| str1 y553a down    | 5' -CTCTCAAAAATGGTAGCTGCTTGGTCTTTC               |                                     |
| str1 y567a UP      | 5' -GCCATCATCTTTCTGCTAGTGAAGTCC                  |                                     |
| str1 y567a down    | 5' -GGACTTCACTAGCAGAAAGAATGATGGC                 |                                     |
| str1 5utr BamHI    | 5' -AAAAGGATCCCCACTGTATGATCGTGTCAATGTTCTTGG      | oligos for knocking out str1Δ       |
| str1 5utr EcoRI    | 5' -AAAAGAATTTCGCTGATCCAAGGAAAGAAGGAAAGGAAAGG    |                                     |
| str1 3utr Sall     | 5' -AAAAGTCGACCCACATTTTTTGATTTCGAAGGAAAGCAAAG    |                                     |
| str1 3utr KpnI     | 5' -AAAAGGTACCCCAAAGAAATTACCTACCCAGTTGGCAATACC   |                                     |
| sib1 3UTR BamHI    | 5' -CAAAGGATCCACTCGTCAACCCGTTGAAGGCAGATC         | oligos for knocking out sib1Δ sib2Δ |
| sib1 3UTR EcoRI    | 5' -AAAAGAATTCCCGCGGTGCAATATTCATCGACATC          |                                     |
| sib2 3UTR Sall     | 5' -AAAAGTCGACCCCTTTCATGCCTTATTTTCGATAG          |                                     |
| sib2 3UTR KpnI     | 5' -ACACAGGTACCTTAACGAACAACATGCTTTGCAAGT         |                                     |
| fip1 3UTR BamHI    | 5' -AAAAGGATCCTTAATGAGACTCACGAATTTTATTGATGAC     | oligos for knocking out fip1Δ fio1Δ |
| fip1 3UTR EcoRI    | 5' -AAAAGAATTCCCATCCTTAGCTACATCATCTATTGGC        |                                     |
| fio1 3UTR Sall     | 5' -AAAAGTCGACCCAACGATCGGAAATGGTGTGGTAAC         |                                     |
| fio1 3UTR KpnI     | 5' -AAAAGGTACCTTATTTTATTTTTCATCTTTTCCTTCCACCAC   |                                     |
