# Supplementary material
Source: publisher figshare collection journal article supplement (https://gsajournals.figshare.com/articles/dataset/_/7568822)
Supplement: Supplementary file 2 [file 2]

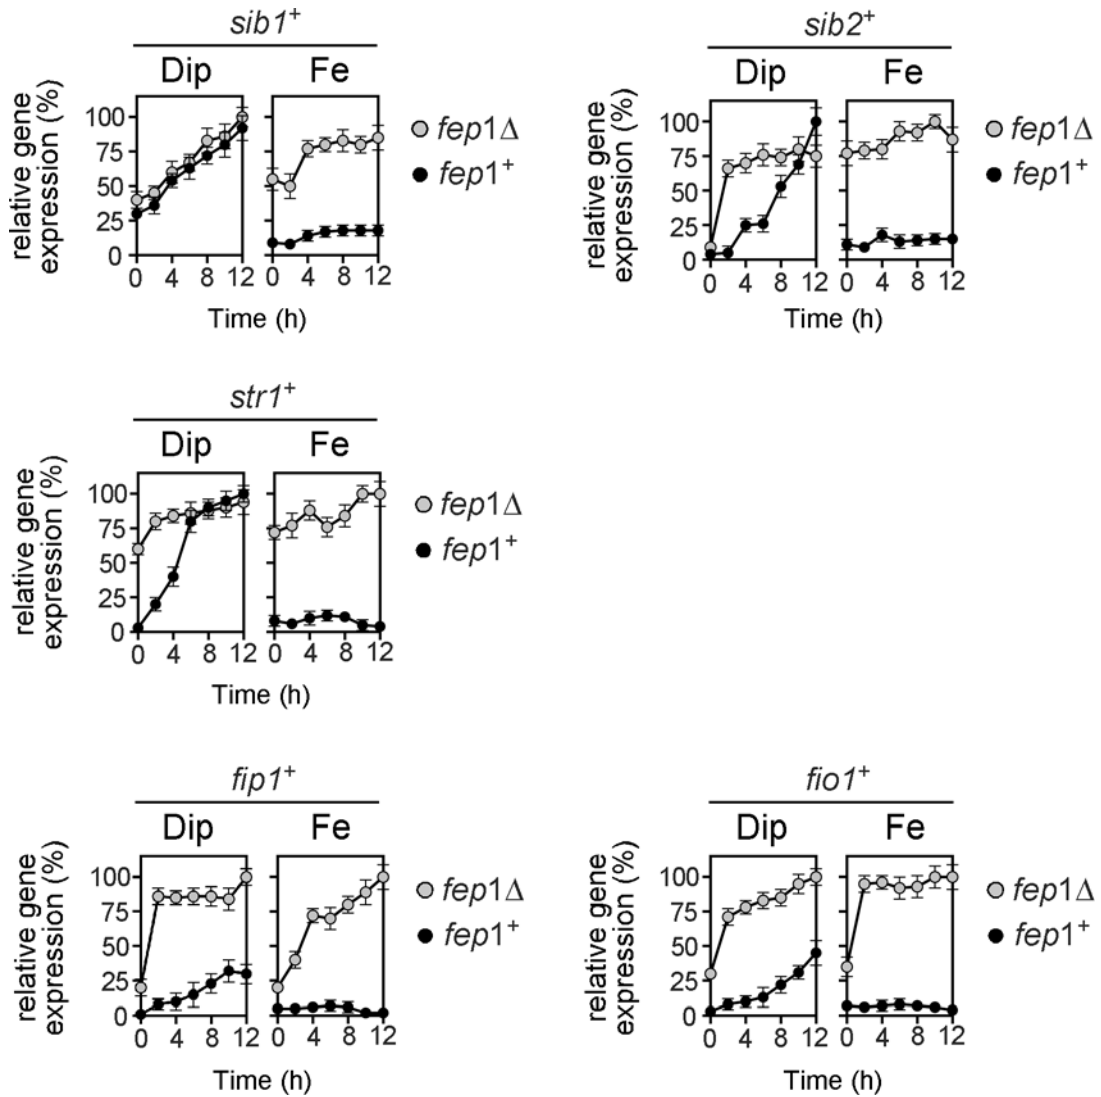

**Figure S1.** Transcript levels of *sib1+*, *sib2+*, *str1+*, *fip1+*, and *fio1+* in wild-type (*fep1+*) and *fep1Δ* spores during germination and outgrowth. Graphs represent a quantitative comparison of *sib1+*, *sib2+*, *str1+*, *fip1+*, and *fio1+* mRNA levels in wild-type (*fep1+*) versus *fep1Δ* spores in the presence of Dip (125 μM) or FeCl<sub>3</sub> (Fe, 100 μM).
